# Supplementary material for: Tip60 acetylation of histone H3K4 temporally controls chromosome passenger complex localization
Source: PubMed Central journal article supplement — Mol Biol Cell. 2022 Jul 21;33(9):br15. doi: 10.1091/mbc.E21-06-0283 (PMC9582641; doi:10.1091/mbc.e21-06-0283), 2022-07-21
Supplement: mbc-33-br15-s001.pdf [file mbc-33-br15-s001.pdf]

# Supplementary Materials

*Molecular Biology of the Cell*

Niedzialkowska *et al.*

## Supplementary materials

### **Tip60 acetylation of histone H3K4 temporally controls Chromosome Passenger Complex localization**

Ewa Niedzialkowska<sup>1</sup>, Limin Liu<sup>1</sup>, Cem Kuscu<sup>2</sup>, Zachary Mayo<sup>3</sup>, Wladek Minor<sup>4</sup>, Brian D. Strahl<sup>3</sup>, Mazhar Adli<sup>5</sup> and P. Todd Stukenberg<sup>1,6</sup>

<sup>1</sup>*Department of Biochemistry and Molecular Genetics, University of Virginia, Charlottesville VA, 22908, USA*

<sup>2</sup>*Department of Surgery, James D. Eason Transplant Institute, UTHSC, Memphis, 38103, TN*

<sup>3</sup>*Department of Biochemistry and Biophysics, University of North Carolina, Chapel Hill, Chapel Hill, NC 27599*

<sup>4</sup>*Department of Molecular Biology and Biological Physics, University of Virginia, Charlottesville VA, 22908, USA*

<sup>5</sup> Department of ObGyn, Robert Lurie Comprehensive Cancer Center, Northwestern University Feinberg School of Medicine, Chicago, IL 60611, USA

<sup>6</sup>*To whom the correspondence should be addressed (pts7h@virginia.edu)*

**Supplementary Figure 1.** Superimposition of hSurvivin structures with histone H3K4 methylated peptides

**Supplementary Figure 2.** Specificity of antibodies against histone H3 K4ac used in this study.

**Supplementary Figure 3.** Deacetylation of histone H3K4ac by HDAC3 activity is important for targeting of Aurora B to centromeres.

**Table S1.** Crystallization conditions

**Table S2.** Refinement statistics

## Supplementary Figure 1.

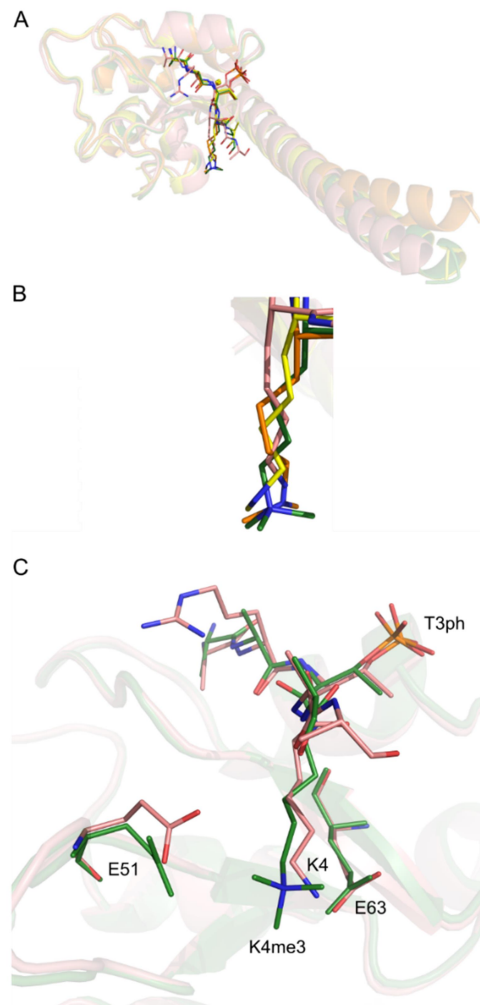

### Supplementary Figure 1. Superimposition of hSurvivin structures with histone H3K4 methylated peptides

A. Overall view on the hSurvivin with bound H3K4 methylated peptides.

B. Closeup view on the binding region; hSurvivin is displayed in transparent mode, carbon atoms of unmodified histone are colored pink, carbon atoms of H3K4 monomethylated peptide are colored yellow, H3K4 dimethylated peptide are colored orange and H3K4 trimethylated peptide colored green.

C. Superimposition of hSurvivin bound to unmodified H3 (pink) and trimethylated on K4 (green).

## Supplementary Figure 2.

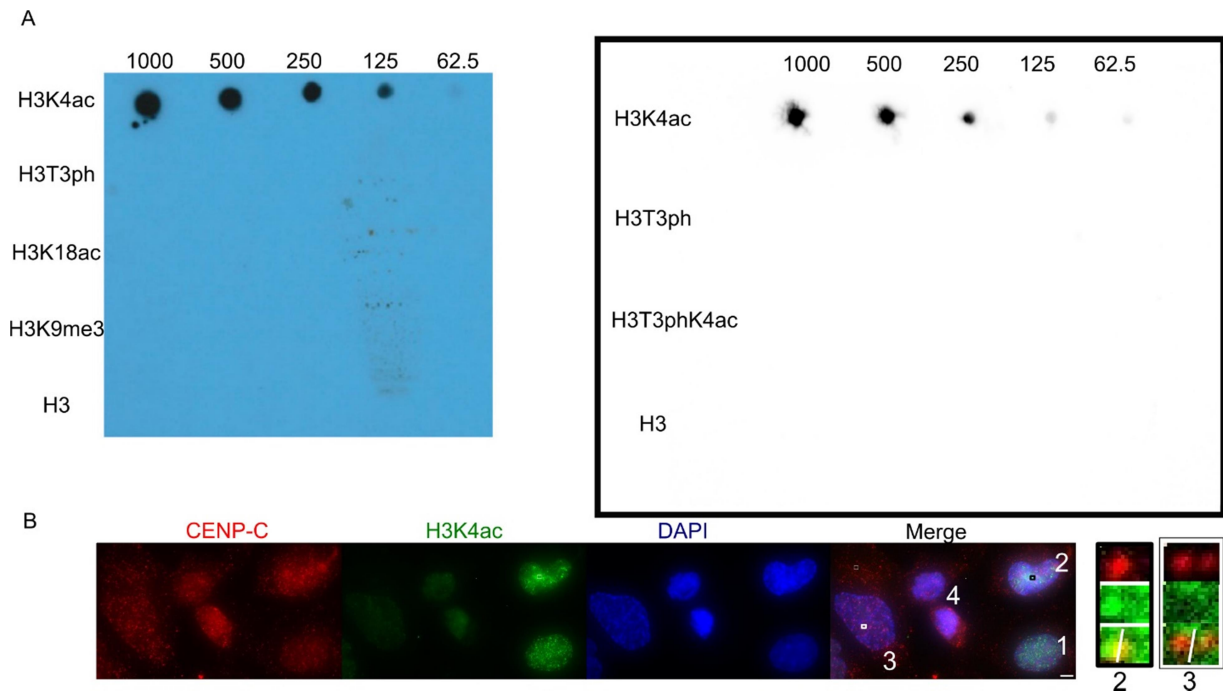

**Supplementary Figure 2. Specificity of antibodies against histone H3K4ac used in this study.** A. Specificity of the histone H3K4ac antibody measured by immunoblot of the indicated peptides at the specified concentrations.

B. A field of cells stained with DAPI, and H3K4ac and CENP-C antibodies. The cell 1 is in S/G2 (high H3K4ac), 2 is early prophase, 3 late prophase and 4 in telophase/G1. Insets show boxed regions. Scale bar, 5 $\mu$ m.

### Supplementary Figure 3

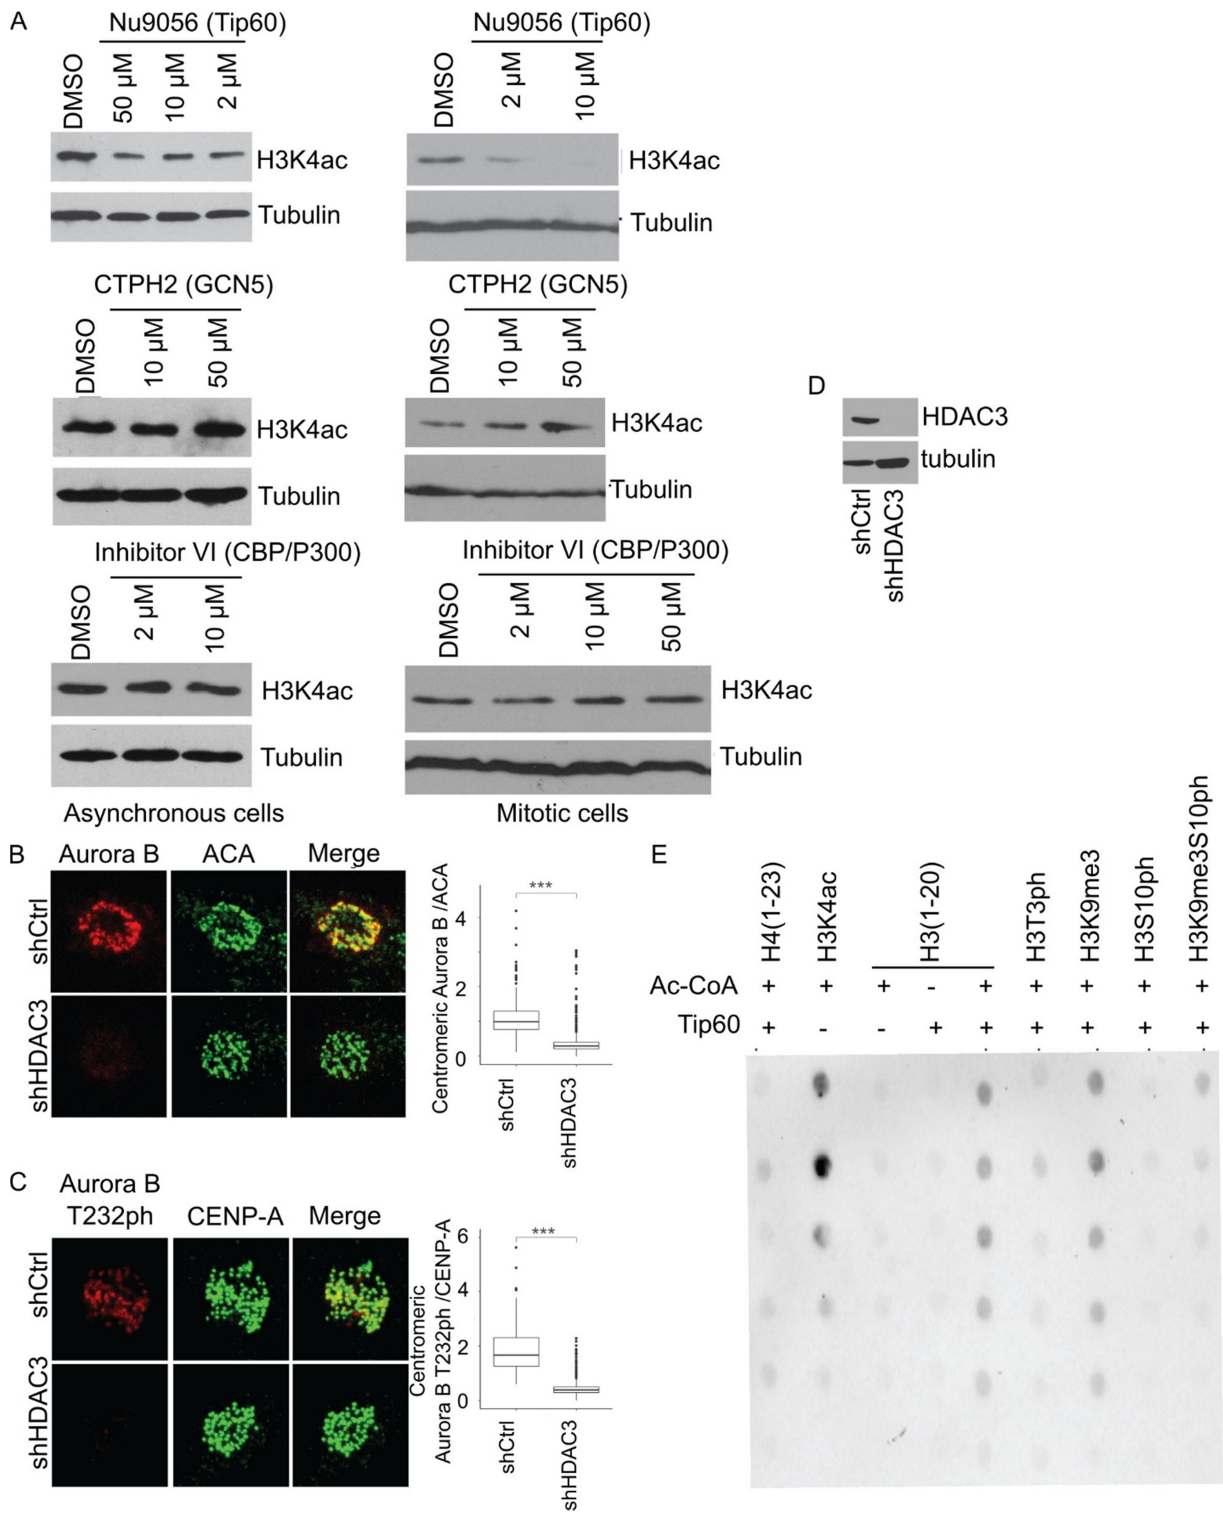

**Supplementary Figure 3. Deacetylation of histone H3K4ac by HDAC3 activity is important for targeting of Aurora B to centromeres.**

A. Comparison of inhibition of three different histone acetyltransferases suggests that Tip60 specifically acetylates histone H3 on K4. Analysis of the indicated inhibitors of acetyltransferases in asynchronous cells and cells synchronized in mitosis revealed that Nu9056, a Tip60 acetyltransferase inhibitor decreased histone H3K4 acetylation signal, but GCN5 and p300 inhibitors had little effect. The images for Nu9056 are the same as in figure 3A.

B. and C. Aurora B doesn't localize to centromeres in cells treated with shHDAC3 as shown by immunofluorescence using antibodies against Aurora B or against phosphorylated T-loop.

D. Western blot to show efficiency of knockdown of HDAC3 by siRNA targeting.

E. In vitro assay for Tip60 activity on histone H3 tail peptides with various post-translational modifications showing the full titration range of the peptides. Only the 500ng concentration of peptide is shown in figure 3C

**Table S1. Crystallization conditions**

| <b>Complex</b>                           | <b>PDB code</b> | <b>Crystallization conditions</b>                                                                                                             |
|------------------------------------------|-----------------|-----------------------------------------------------------------------------------------------------------------------------------------------|
| hSurvivin wild type<br>H3T3phK4me1(1-12) | 7LBO            | 0.16 M potassium/sodium tartrate, 12% PEG 3350                                                                                                |
| hSurvivin wild type<br>H3T3phK4me2(1-12) | 7LBQ            | 2.25 mM spermine, 9 mM MgCl <sub>2</sub> , 0.9 mM spermidine, 1.8 mM cobalt (III)hexamine chloride, 0.05 sodium cacodylate pH 7.0, 5% PEG 400 |
| hSurvivin wild type<br>H3T3phK4me3(1-12) | 7LBK            | 0.16 M potassium/sodium tartrate, 14% PEG 3350;                                                                                               |
| hSurvivin wild type<br>H3T3phK4ac(1-12)  | 7LBP            | 0.16 M potassium/sodium tartrate, 12% PEG 3350                                                                                                |

**Table S2. Refinement statistics**

|                                             | hSurvivin wild<br>type<br>H3T3phK4me1<br>(1-12) | hSurvivin wild<br>type<br>H3T3phK4me2<br>(1-12) | hSurvivin wild<br>type<br>H3T3phK4me3<br>(1-12) | hSurvivin wild<br>type<br>H3T3phK4ac (1-<br>12) |
|---------------------------------------------|-------------------------------------------------|-------------------------------------------------|-------------------------------------------------|-------------------------------------------------|
| <b>PDB code</b>                             | <b>7LBO</b>                                     | <b>7LBQ</b>                                     | <b>7LBK</b>                                     | <b>7LBP</b>                                     |
| <b>Data collection</b>                      |                                                 |                                                 |                                                 |                                                 |
| Space group                                 | C2                                              | I222                                            | C2                                              | C2                                              |
| a,b,c (Å)                                   | 114.18<br>71.44<br>82.79                        | 69.34<br>70.16<br>89.45                         | 114.29<br>71.37<br>82.55                        | 113.12<br>70.99<br>83.32                        |
| $\beta$ (°)<br>$\alpha = \gamma = 90^\circ$ | 129.11                                          | 90                                              | 129.33                                          | 130.04                                          |
| Resolution (Å)                              | 2.50<br>(2.50-2.54)                             | 2.60<br>(2.64 -2.60)                            | 2.70<br>(2.70-2.75)                             | 2.60<br>(2.60-2.64)                             |
| $R_{\text{merge}}^1$                        | 0.043 (0.329)                                   | 0.087 (0.892)                                   | 0.100 (0.764)                                   | 0.053 (0.427)                                   |
| $I / \sigma(I)^1$                           | 38.0 (3.8)                                      | 20.7 (1.9)                                      | 28.9 (2.4)                                      | 3.0 (2.3)                                       |
| Completeness (%) <sup>1</sup>               | 99.5 (100.0)                                    | 99.2 (99.7)                                     | 98.1 (93.0)                                     | 98.6 (89.3)                                     |
| Redundancy <sup>1</sup>                     | 3.8 (3.8)                                       | 6.6 (4.7)                                       | 14.8 (11.4)                                     | 3.7 (3.0)                                       |
| <b>Refinement</b>                           |                                                 |                                                 |                                                 |                                                 |
| Resolution (Å)                              | 50.0-2.50                                       | 50-2.69                                         | 50.0-2.70                                       | 50.00-2.60                                      |
| Number<br>reflections                       | of<br>17812                                     | 6097                                            | 13890                                           | 15604                                           |
| $R_{\text{work}} / R_{\text{free}}$         | 20.7/26.1                                       | 24.8/26.8                                       | 21.2/25.3                                       | 21.2/24.7                                       |
| <i>Number of atoms</i>                      |                                                 |                                                 |                                                 |                                                 |
| Protein                                     | 2236                                            | 1054                                            | 2250                                            | 2230                                            |
| Ligands/ions                                | 2                                               | 1                                               | 2                                               | 2                                               |
| Water                                       | 14                                              | 7                                               | 34                                              | 5                                               |
| <i>B factors</i>                            |                                                 |                                                 |                                                 |                                                 |
| Protein                                     | 90.5                                            | 53.8                                            | 40.8                                            | 105.8                                           |
| Ligand/ion                                  | 70.8                                            | 25.9                                            | 22.7                                            | 91.2                                            |
| Water                                       | 83.9                                            | 32.0                                            | 28.4                                            | 101.3                                           |
| <b>Structure quality</b>                    |                                                 |                                                 |                                                 |                                                 |

<sup>1</sup> Values in parentheses correspond to the highest-resolution shell



*R.m.s. Deviations*

|                  |       |       |       |       |
|------------------|-------|-------|-------|-------|
| Bond lengths (Å) | 0.011 | 0.017 | 0.014 | 0.010 |
| Bond angles (°)  | 1.5   | 2.1   | 1.7   | 1.4   |

*Ramachandran  
Statistics*

|             |       |       |       |       |
|-------------|-------|-------|-------|-------|
| Favored (%) | 98.53 | 96.99 | 96.68 | 97.82 |
| Allowed (%) | 1.47  | 3.01  | 3.32  | 2.18  |

---
